# Supplementary material for: pH and reduction dual-responsive nanogel cross-linked by quaternization reaction for enhanced cellular internalization and intracellular drug delivery
Source: Royal Society of Chemistry journal article supplement (doi:10.1039/c2py20871g), 2012-11-07
Supplement: c2py20871g.pdf [file c2py20871g.pdf]

## Electronic Supplementary Information

### **pH and reduction dual-responsive nanogel cross-linked by quaternization reaction for enhanced cellular internalization and intracellular drug delivery**

Mingqiang Li,<sup>a,b</sup> Zhaohui Tang,<sup>a</sup> Hai Sun,<sup>a</sup> Jianxun Ding,<sup>a,b</sup> Wantong Song,<sup>a,b</sup> and Xuesi Chen<sup>\*a</sup>

<sup>a</sup> Key Laboratory of Polymer Ecomaterials, Changchun Institute of Applied Chemistry, Chinese Academy of Sciences, Changchun 130022, P. R. China. Fax: +86 431 85262112; Tel: +86 431 85262112; E-mail: xschen@ciac.jl.cn

<sup>b</sup> Graduate University of the Chinese Academy of Sciences, Beijing 100039, P. R. China

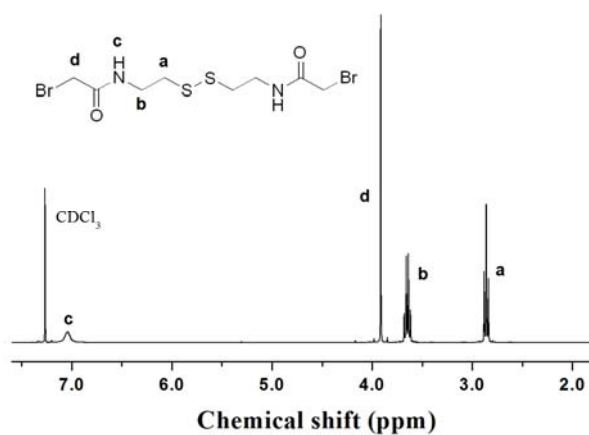

**Fig. S1**  $^1\text{H}$  NMR spectrum of *N,N'*-bis(bromoacetyl) cystamine in  $\text{CDCl}_3$  ( $\delta$  ppm).

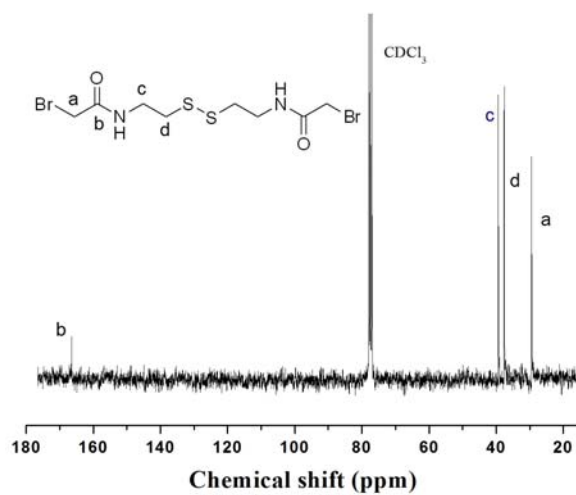

**Fig. S2**  $^{13}\text{C}$  NMR spectrum of *N,N'*-bis(bromoacetyl) cystamine in  $\text{CDCl}_3$  ( $\delta$  ppm).

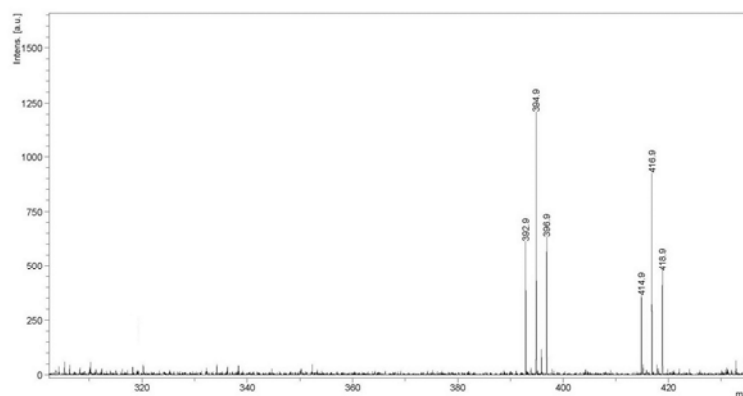

**Fig. S3** The MALDI-TOF mass spectrum of *N,N'*-bis(bromoacetyl) cystamine.  $m/z$  calcd. for  $C_8H_{14}Br_2N_2O_2S_2$  393.8, found 394.9  $[M+H]^+$ , 416.9  $[M+Na]^+$  and 392.9, 396.9, 414.9, 418.9 (bromine isotope pattern).

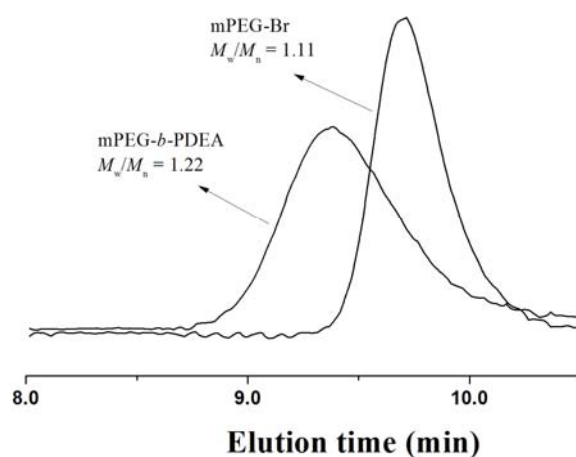

**Fig. S4** GPC traces recorded for mPEG-Br and mPEG-*b*-PDEA with THF as elution.

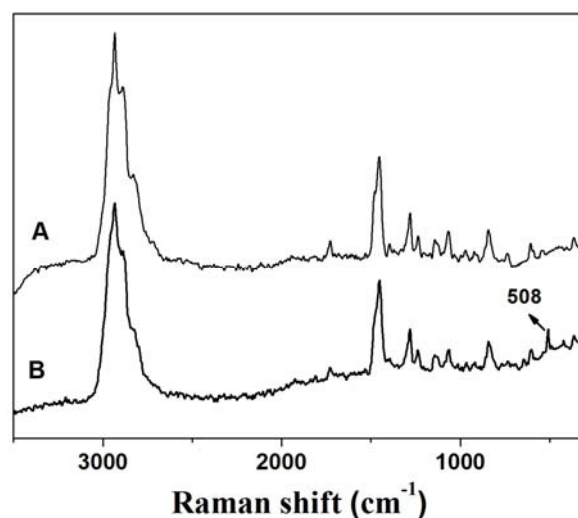

**Fig. S5** Raman spectra of (A) mPEG-*b*-PDEA and (B) disulfide core-cross-linked mPEG-*b*-PDEA nanogel. The absorption at 508  $\text{cm}^{-1}$  corresponded to -S-S- stretch ( $\nu_{\text{S-S}}$ ).

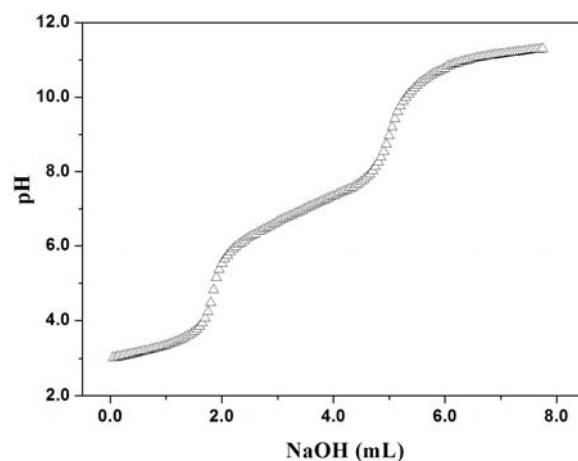

**Fig. S6** Potentiometric titration curve obtained for 1.0  $\text{g L}^{-1}$  aqueous solution of core-cross-linked mPEG-*b*-PDEA nanogel.

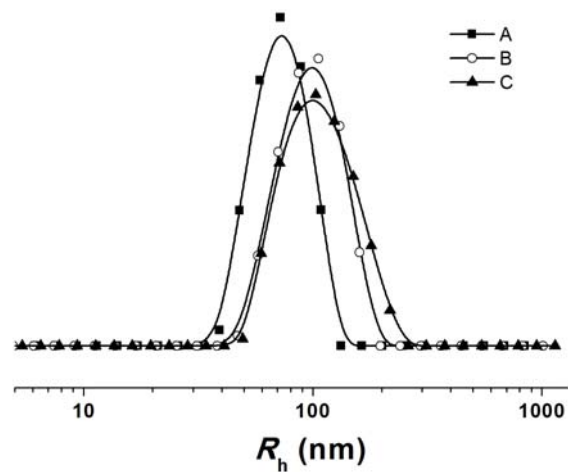

**Fig. S7** Hydrodynamic radius distributions of core-cross-linked mPEG-*b*-PDEA nanogel in (A) water, (B) THF and (C)  $\text{CHCl}_3$ .
